# Supplementary material for: The multiple topological phases in a new family of compounds ACrTe (A = Na, K, Rb, Cs) predicted by first-principles calculations
Source: Royal Society of Chemistry journal article supplement (doi:10.1039/d4cp02235a), 2024-01-01
Supplement: d4cp02235a1.pdf [file d4cp02235a1.pdf]

## Supplemental Material:

### The multiple topological phases in a new family of compounds $ACrTe$ ( $A = Na, K, Rb, Cs$ ) predicted by first-principles calculations

Shuaiqi Peng,<sup>1,2</sup> Qing Wang,<sup>1,2,\*</sup> Xinliang Huang,<sup>1,2</sup> and Ning Hao<sup>1,†</sup>

<sup>1</sup>*Anhui Key Laboratory of Low-Energy Quantum Materials and Devices,  
High Magnetic Field Laboratory, HFIPS,  
Chinese Academy of Sciences, Hefei Anhui 230031, China*

<sup>2</sup>*Science Island Branch of Graduate School,  
University of Science and Technology of China, Hefei, Anhui 230026, China*

(Dated: August 2, 2024)

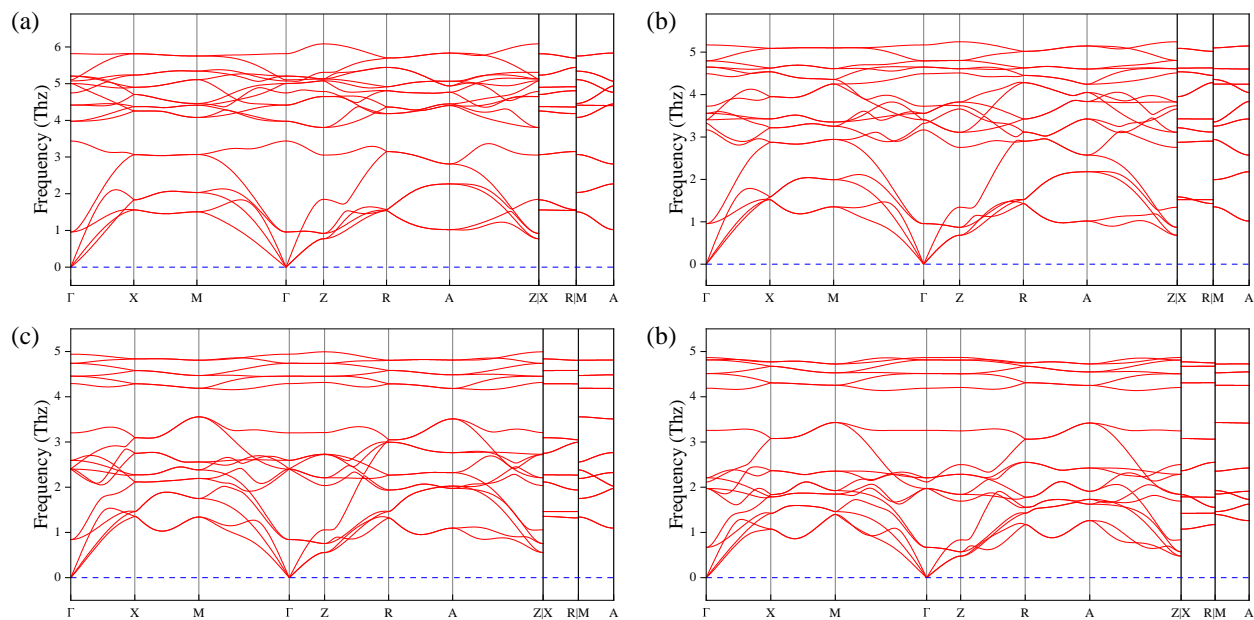

FIG. 1. Phonon spectrum for 3D bulk compound  $ACrTe$  ( $A = Na, K, Rb, Cs$ ) (a)-(d) NaCrTe, KCrTe, RbCrTe and CsCrTe, respectively. In the calculation, the Hubbard  $U$  takes 3eV.

\* [wq2018@mail.ustc.edu.cn](mailto:wq2018@mail.ustc.edu.cn)

† [haon@hmf.ac.cn](mailto:haon@hmf.ac.cn)

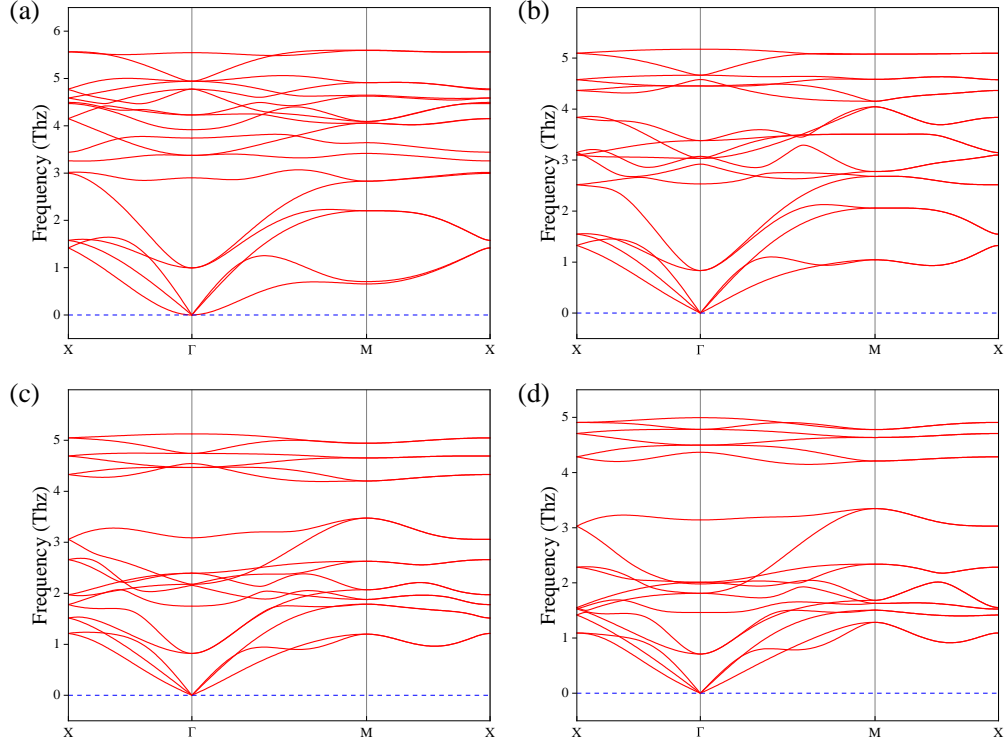

FIG. 2. Phonon spectrum for 2D monolayer case (a)-(d) NaCrTe, KCrTe, RbCrTe and CsCrTe, respectively. In the calculation, the Hubbard  $U$  takes 3 eV.

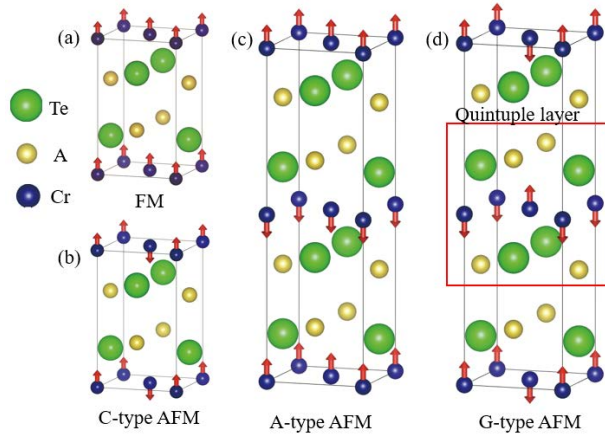

FIG. 3. 3D bulk crystal structure of ACrTe and the four considered magnetic configurations: (a) FM, (b) C-type AFM, (c) A-type AFM, and (d) G-type AFM.

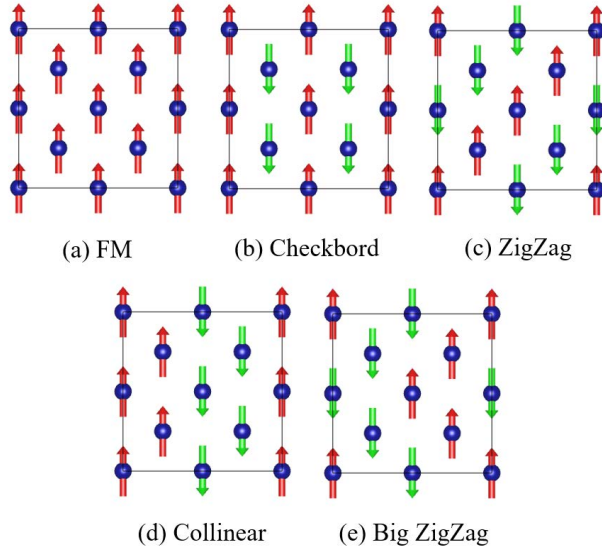

FIG. 4. Different magnetic configurations with  $2 \times 2$  supercell studied for monolayer ACrTe class, including one ferromagnetic (FM) configuration and four antiferromagnetic (AFM) configurations as labeled.
