# Supplementary figures and images for: The multiple topological phases in a new family of compounds ACrTe (A = Na, K, Rb, Cs) predicted by first-principles calculations
Source: Royal Society of Chemistry journal article supplement (doi:10.1039/d4cp02235a), 2024-01-01

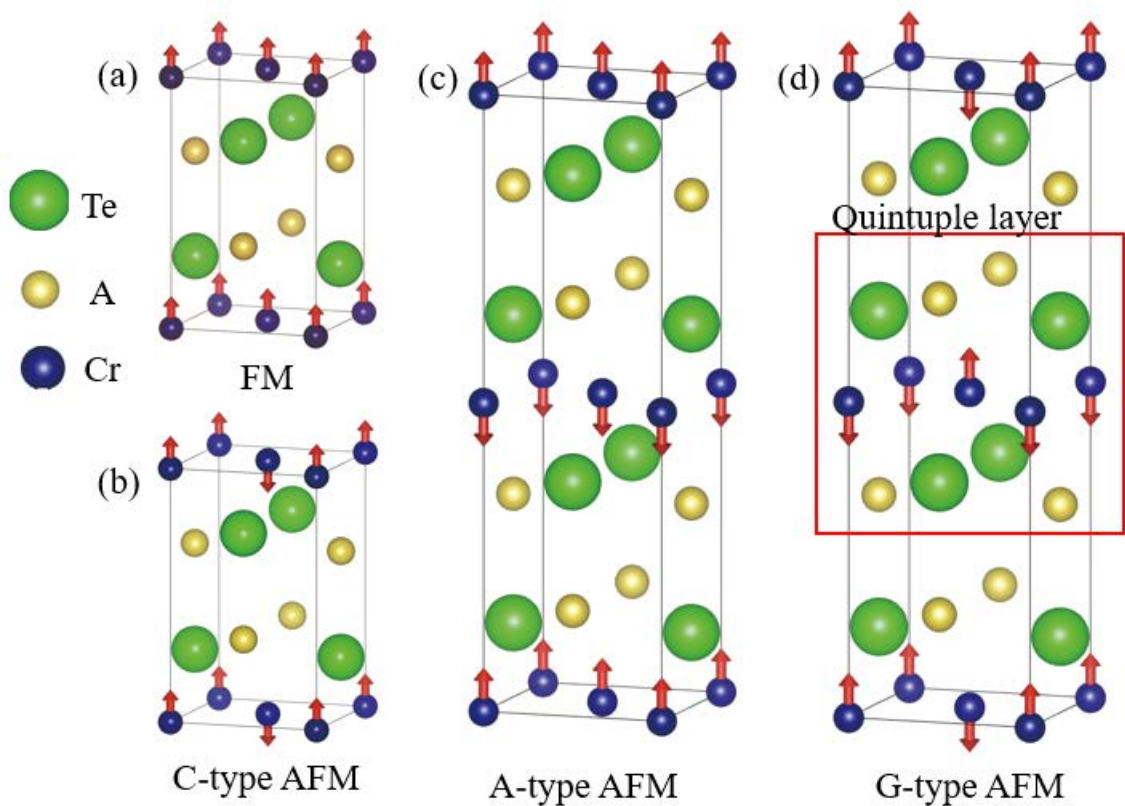

Supplement: d4cp02235a2.zip [file d4cp02235a2.zip]

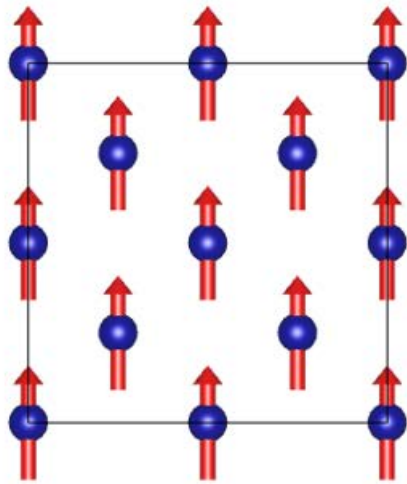

(a) FM

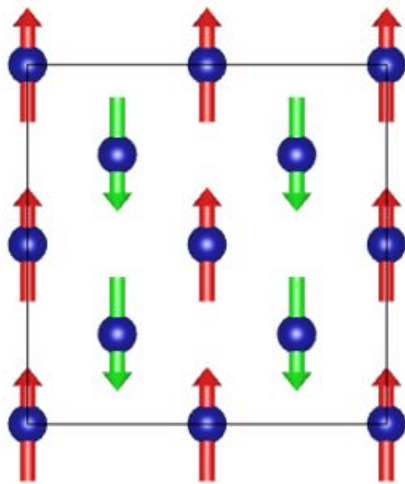

(b) Checkbord

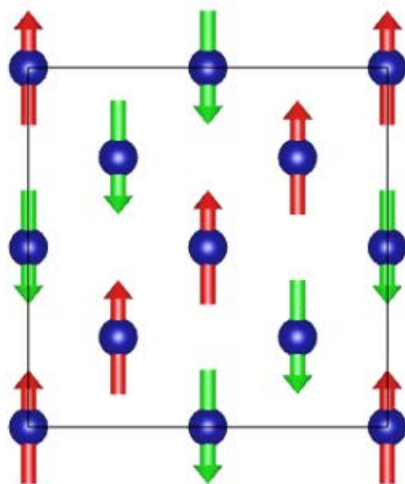

(c) ZigZag

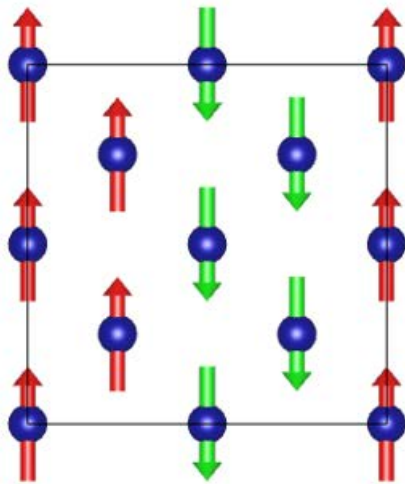

(d) Collinear

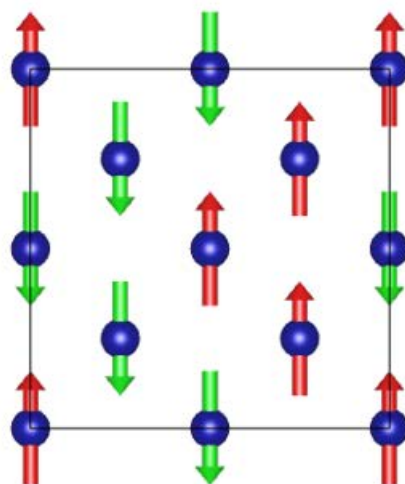

(e) Big ZigZag

Supplement: d4cp02235a2.zip [file d4cp02235a2.zip]

(a)

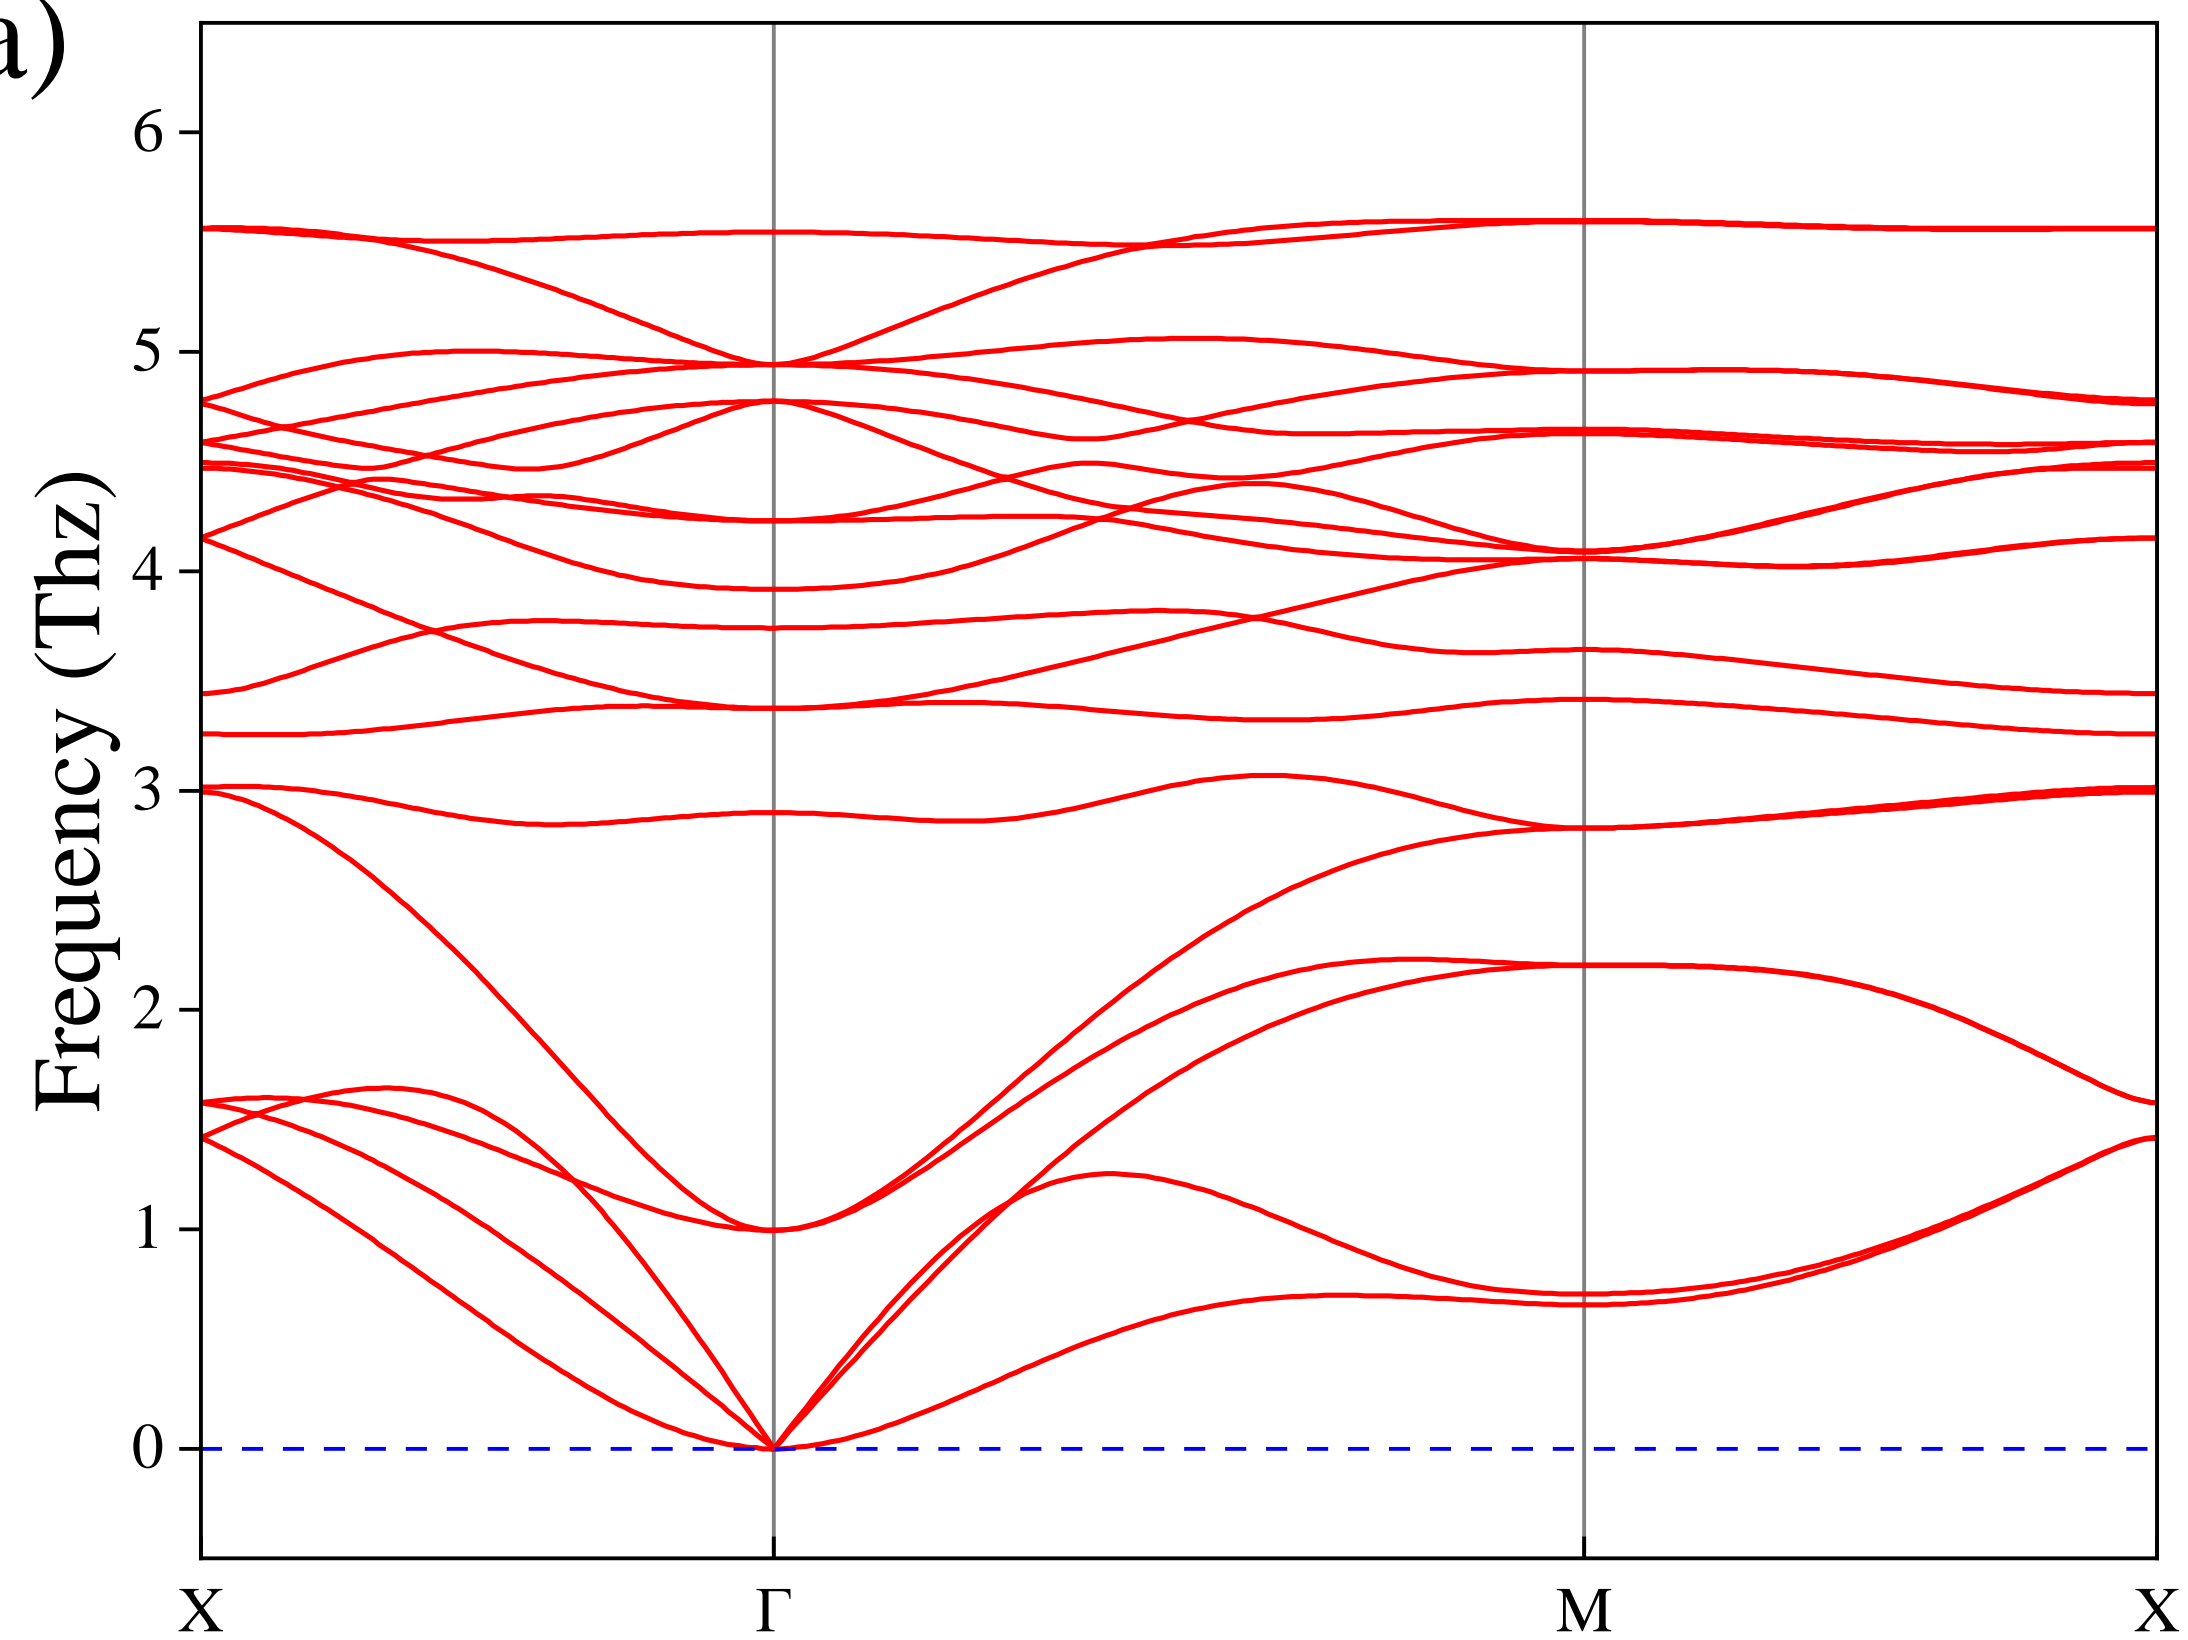

(b)

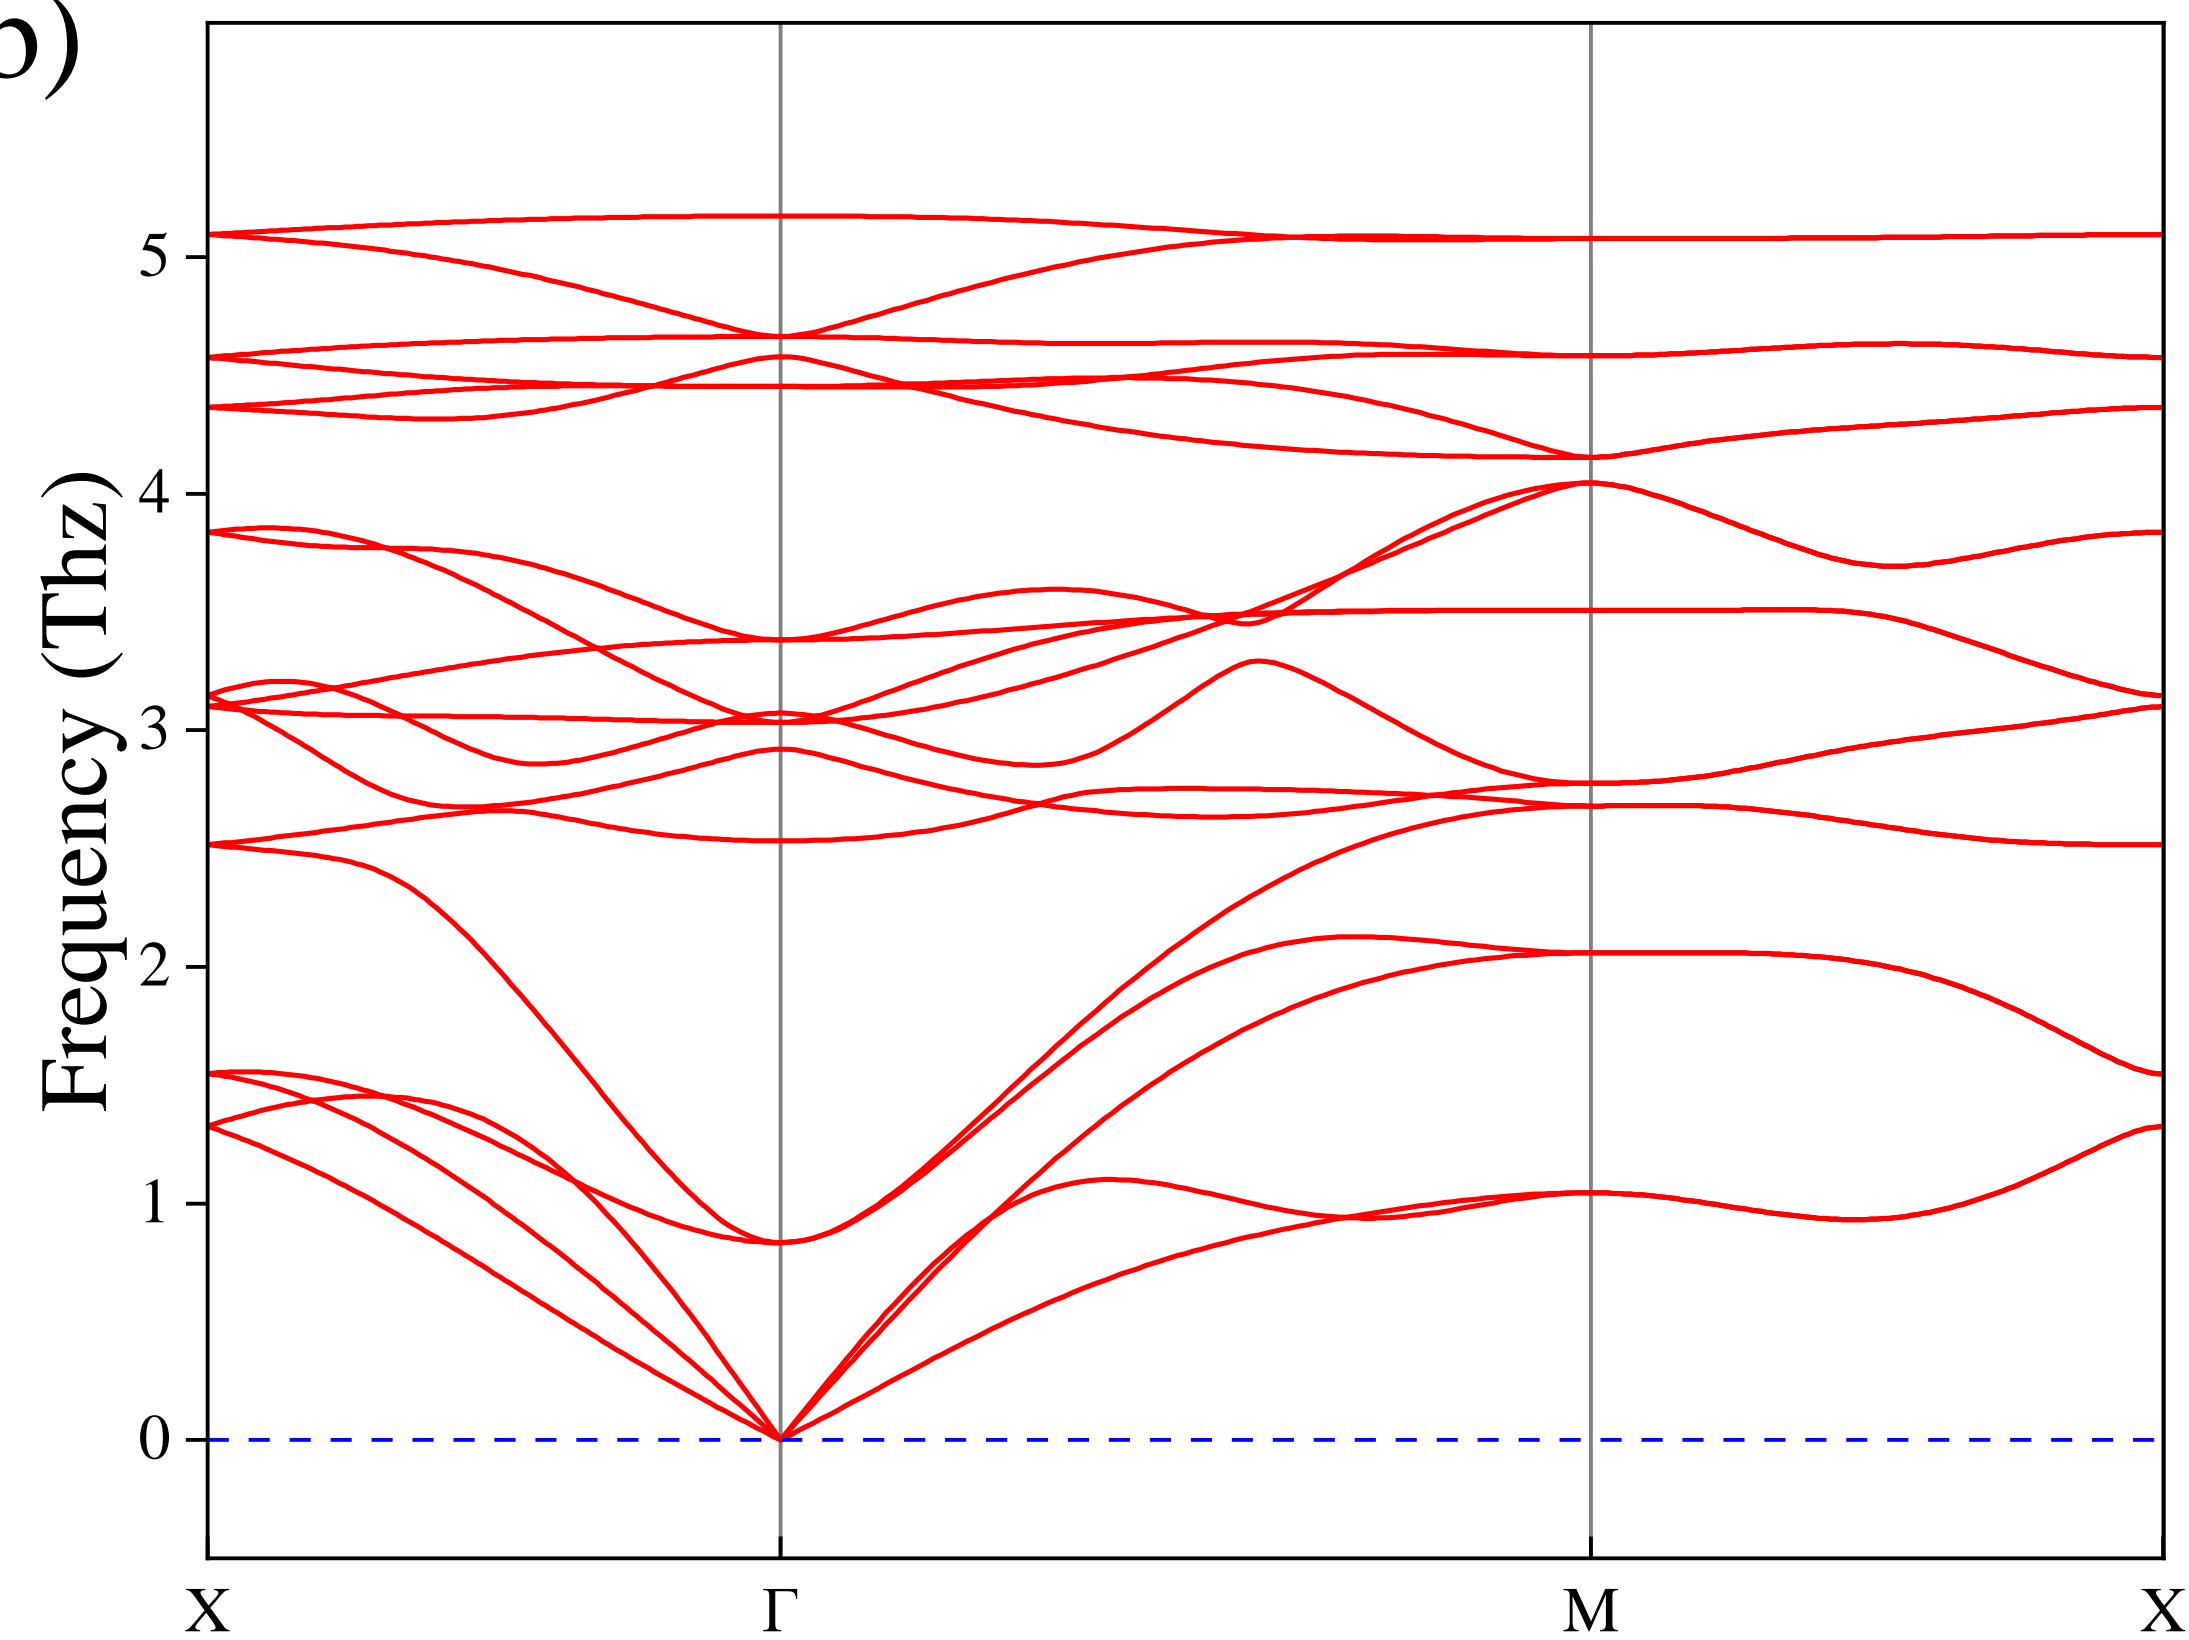

(c)

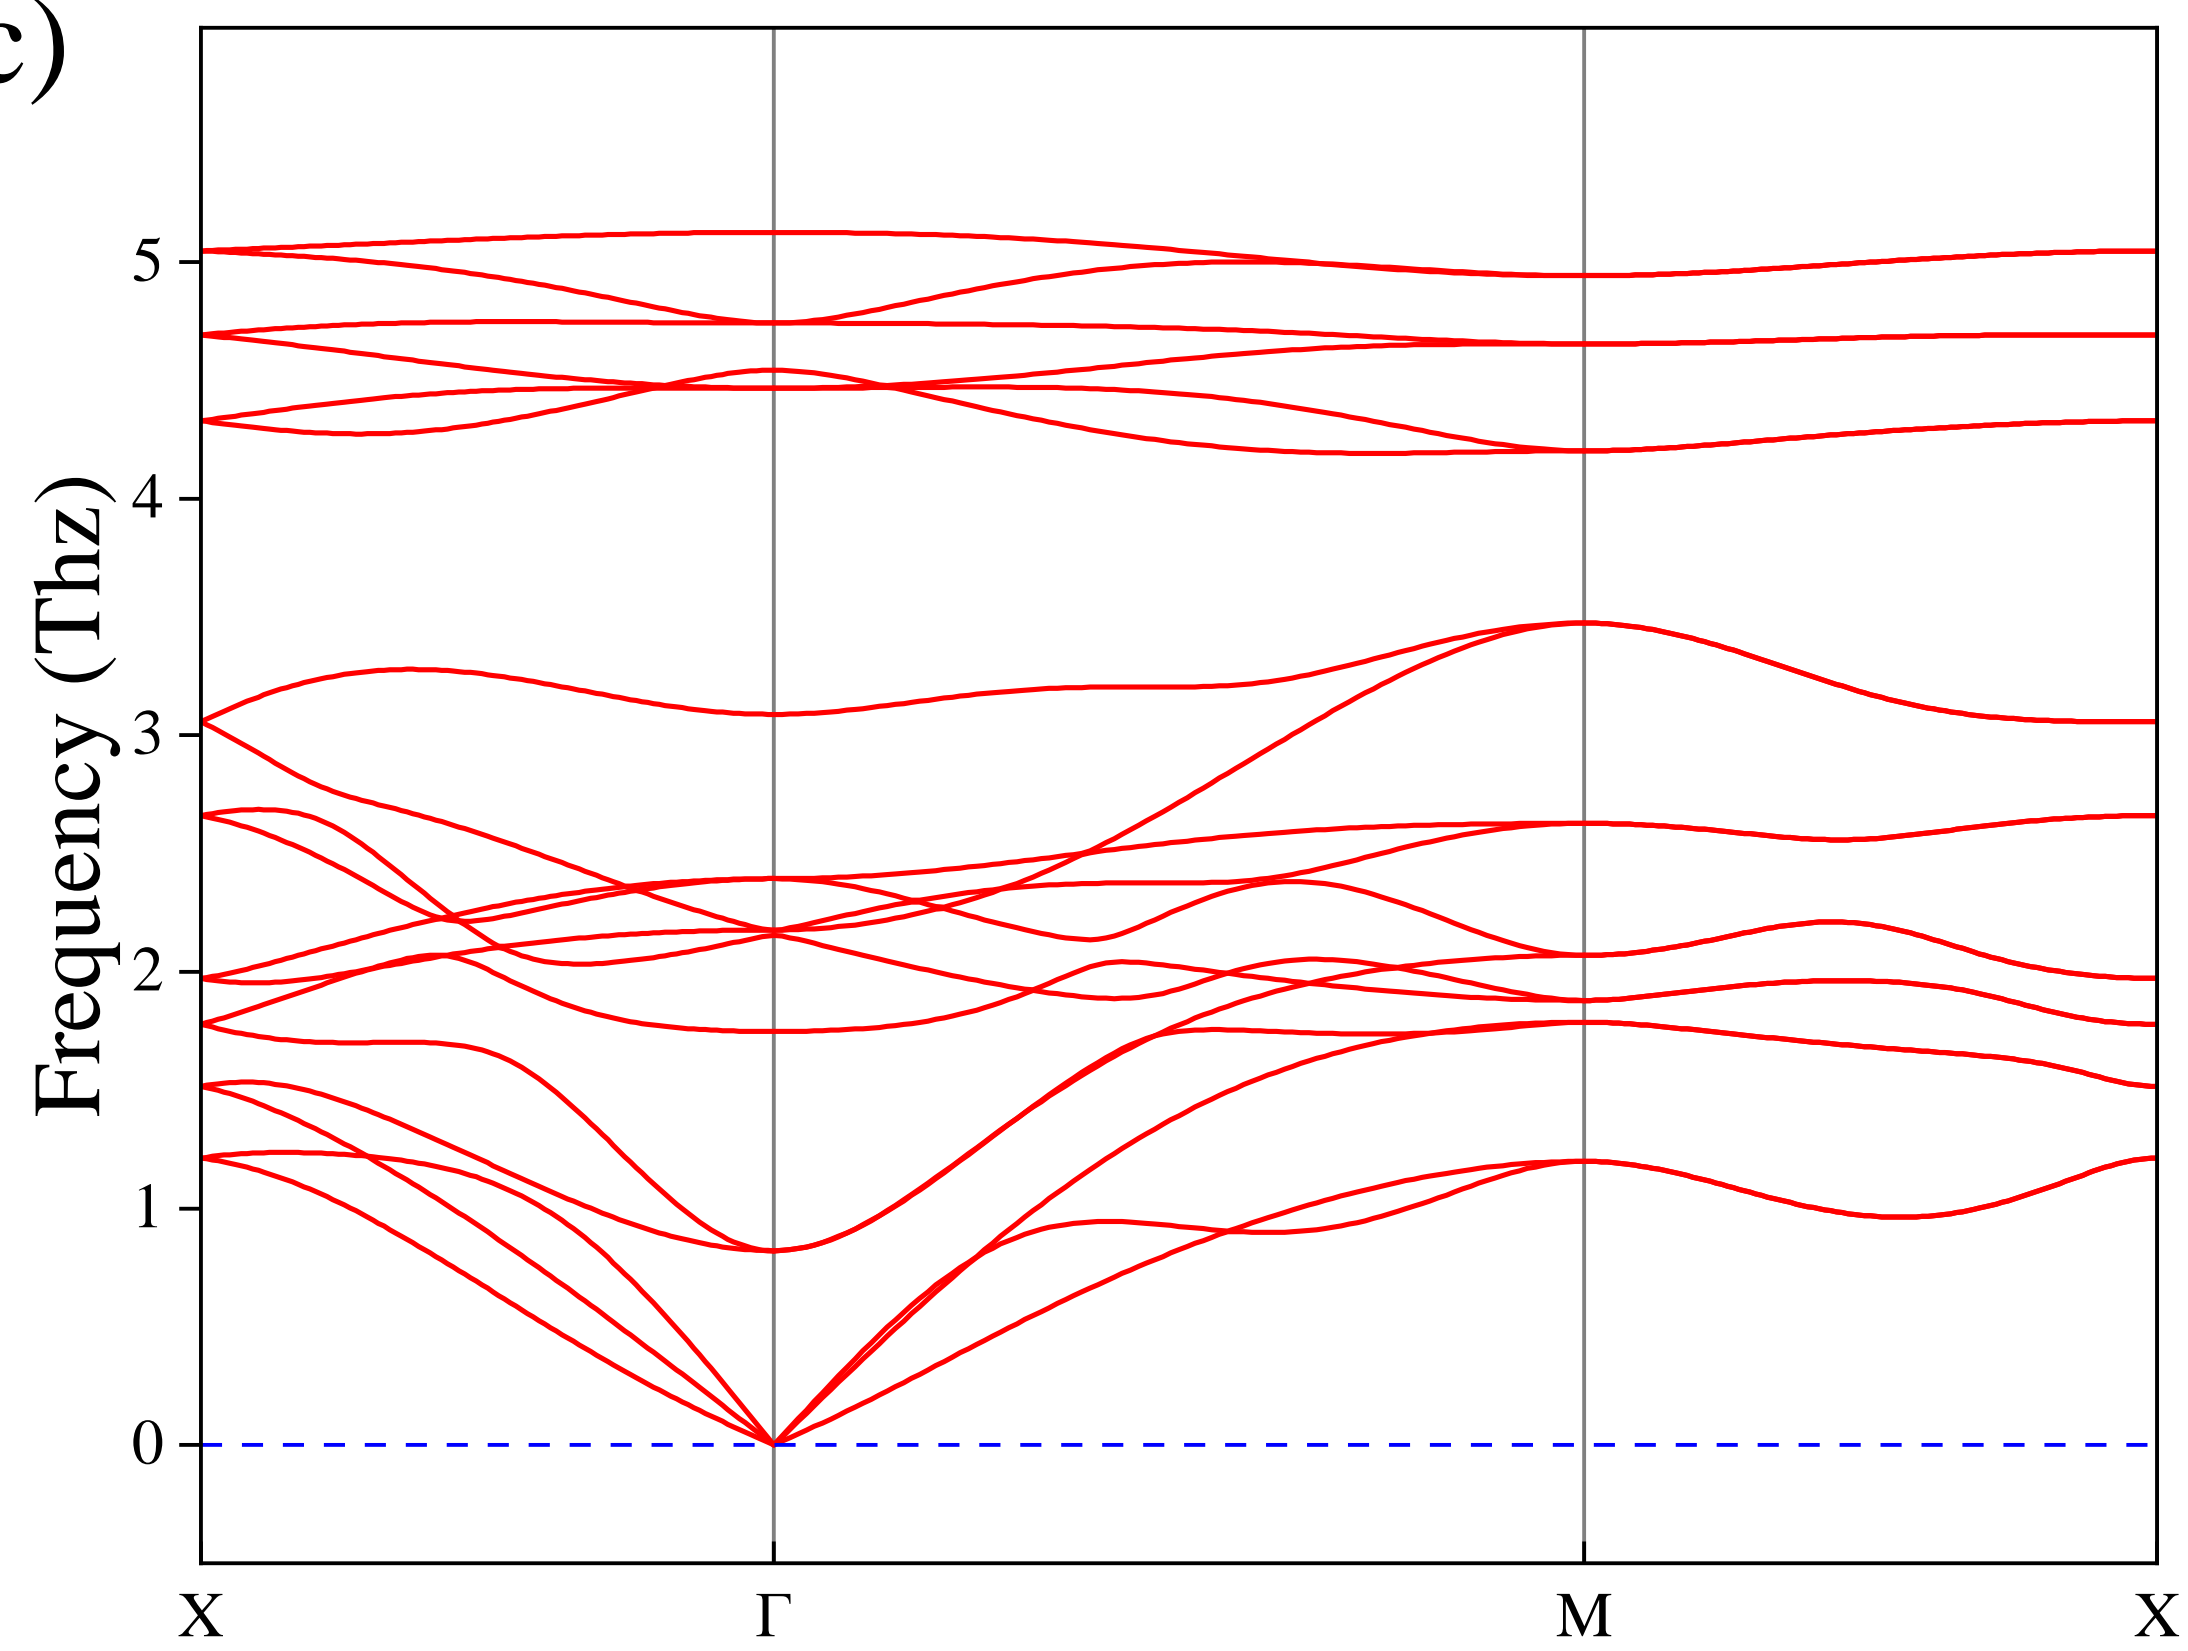

(d)

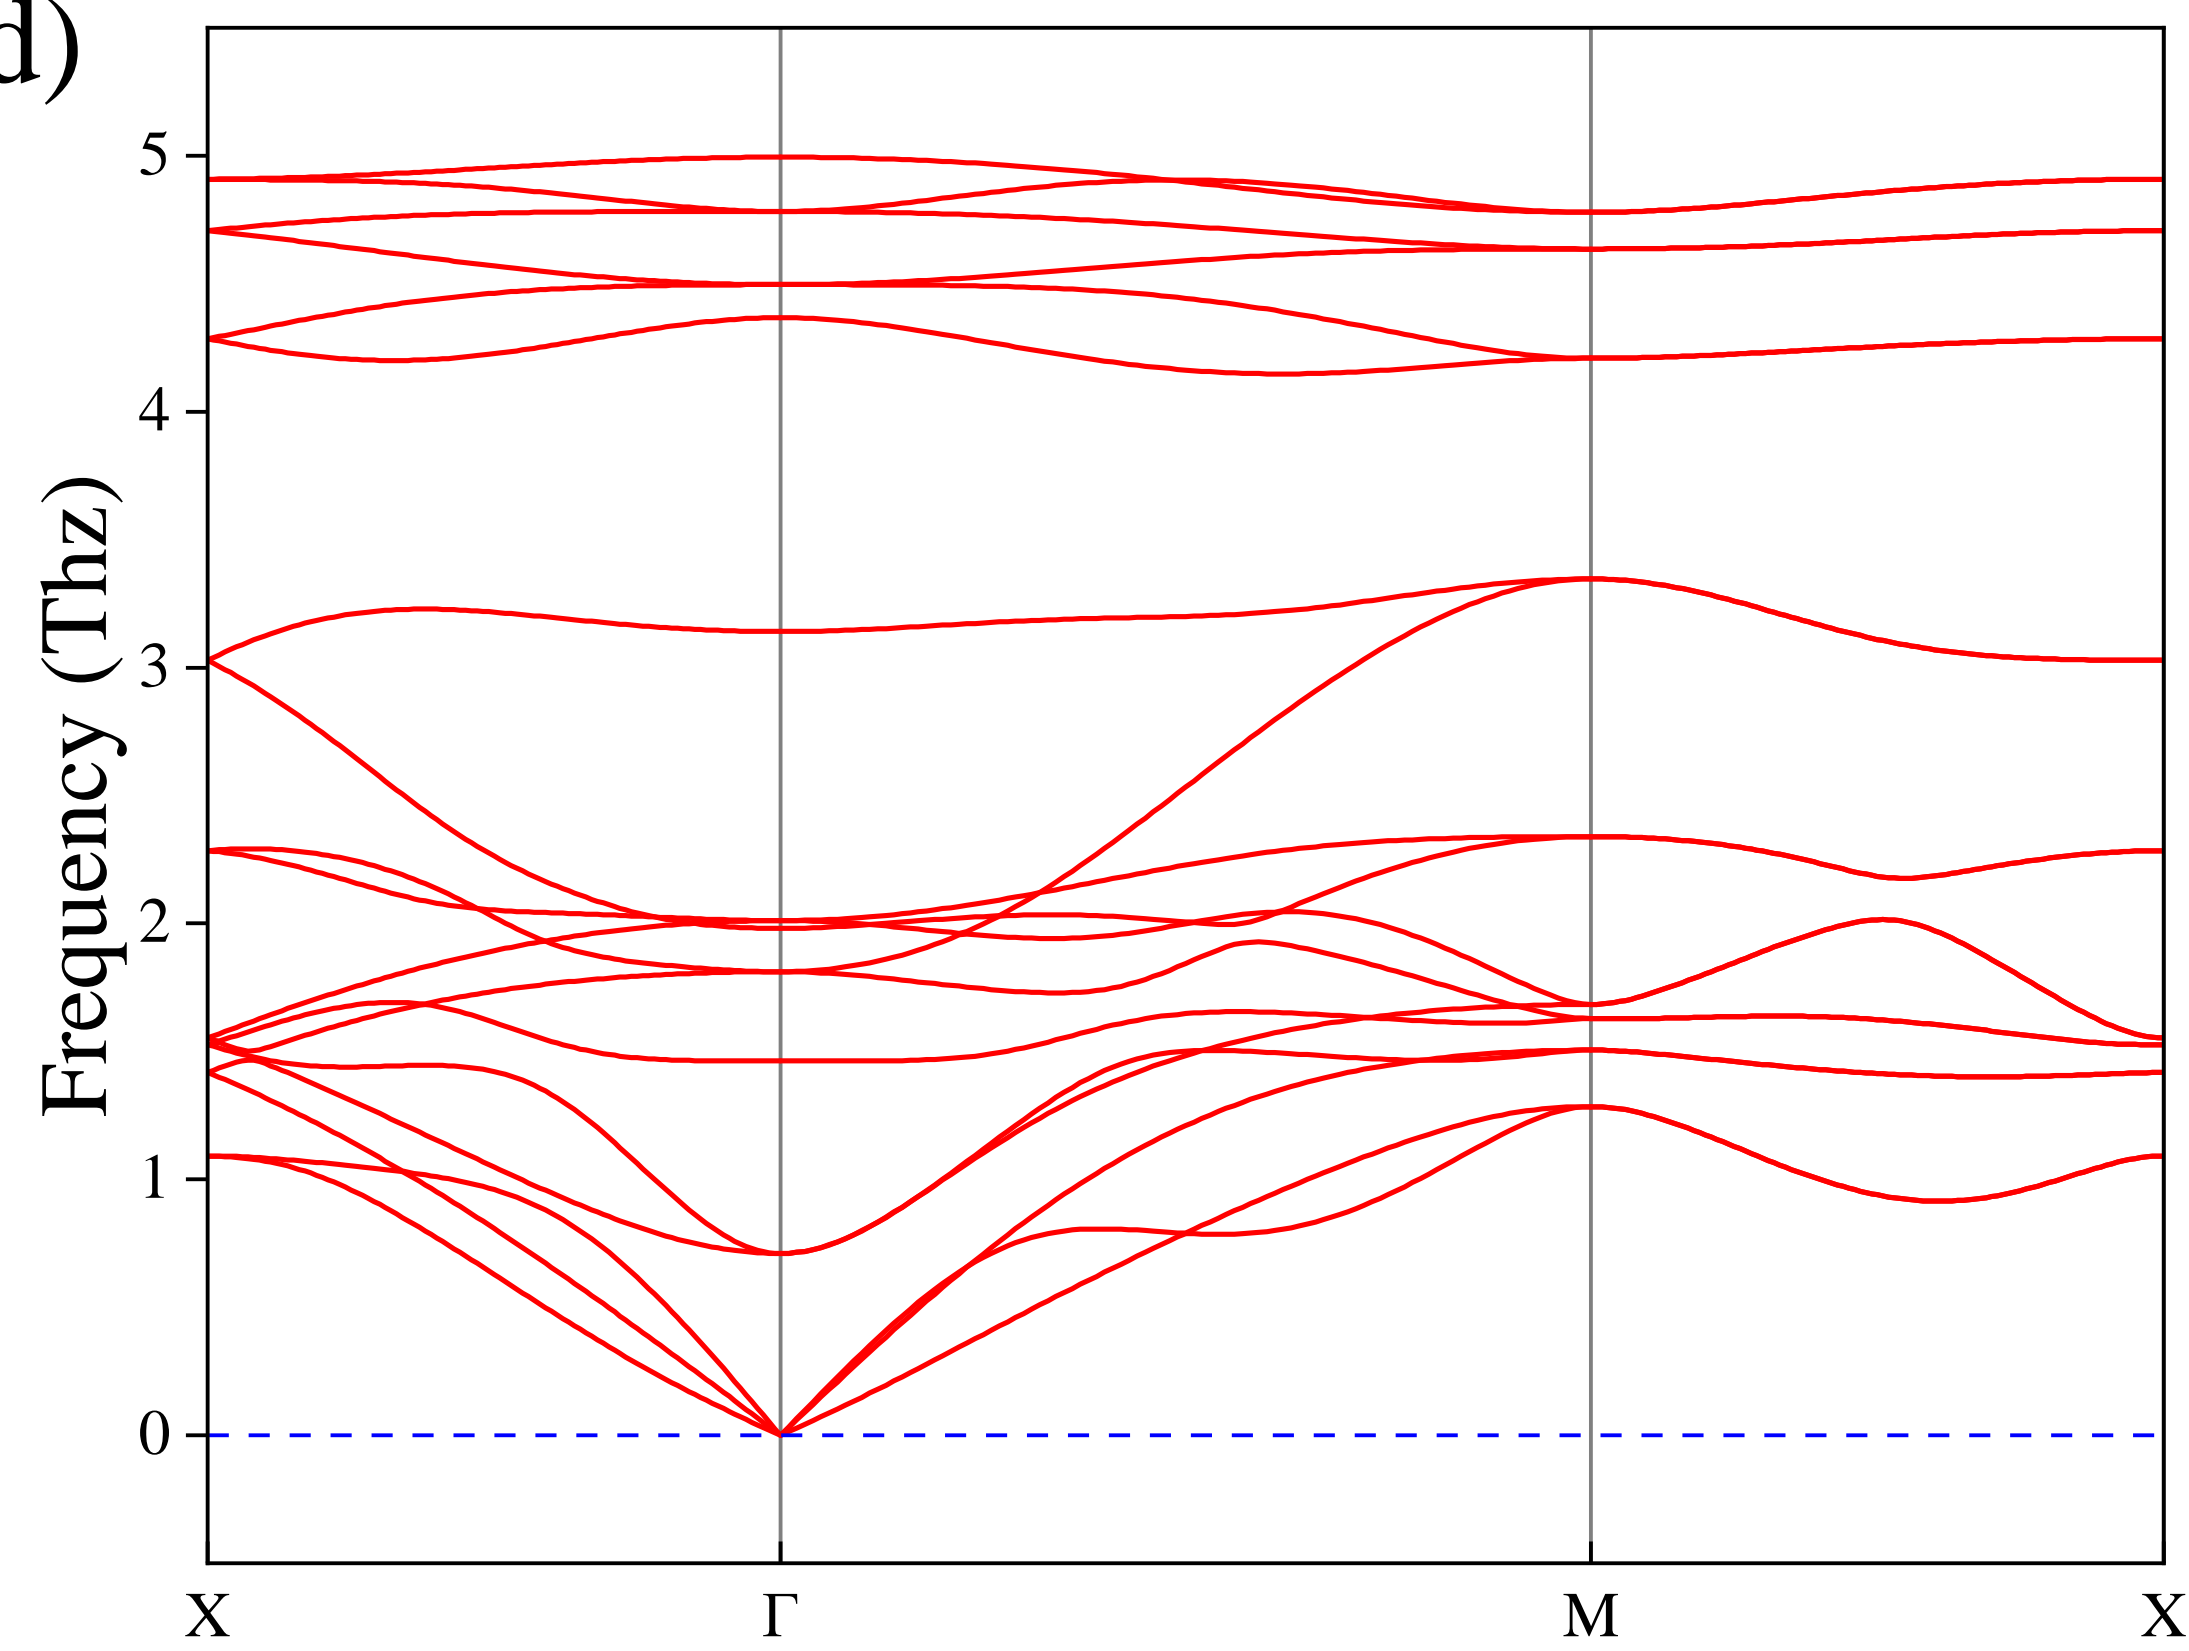

Supplement: d4cp02235a2.zip [file d4cp02235a2.zip]

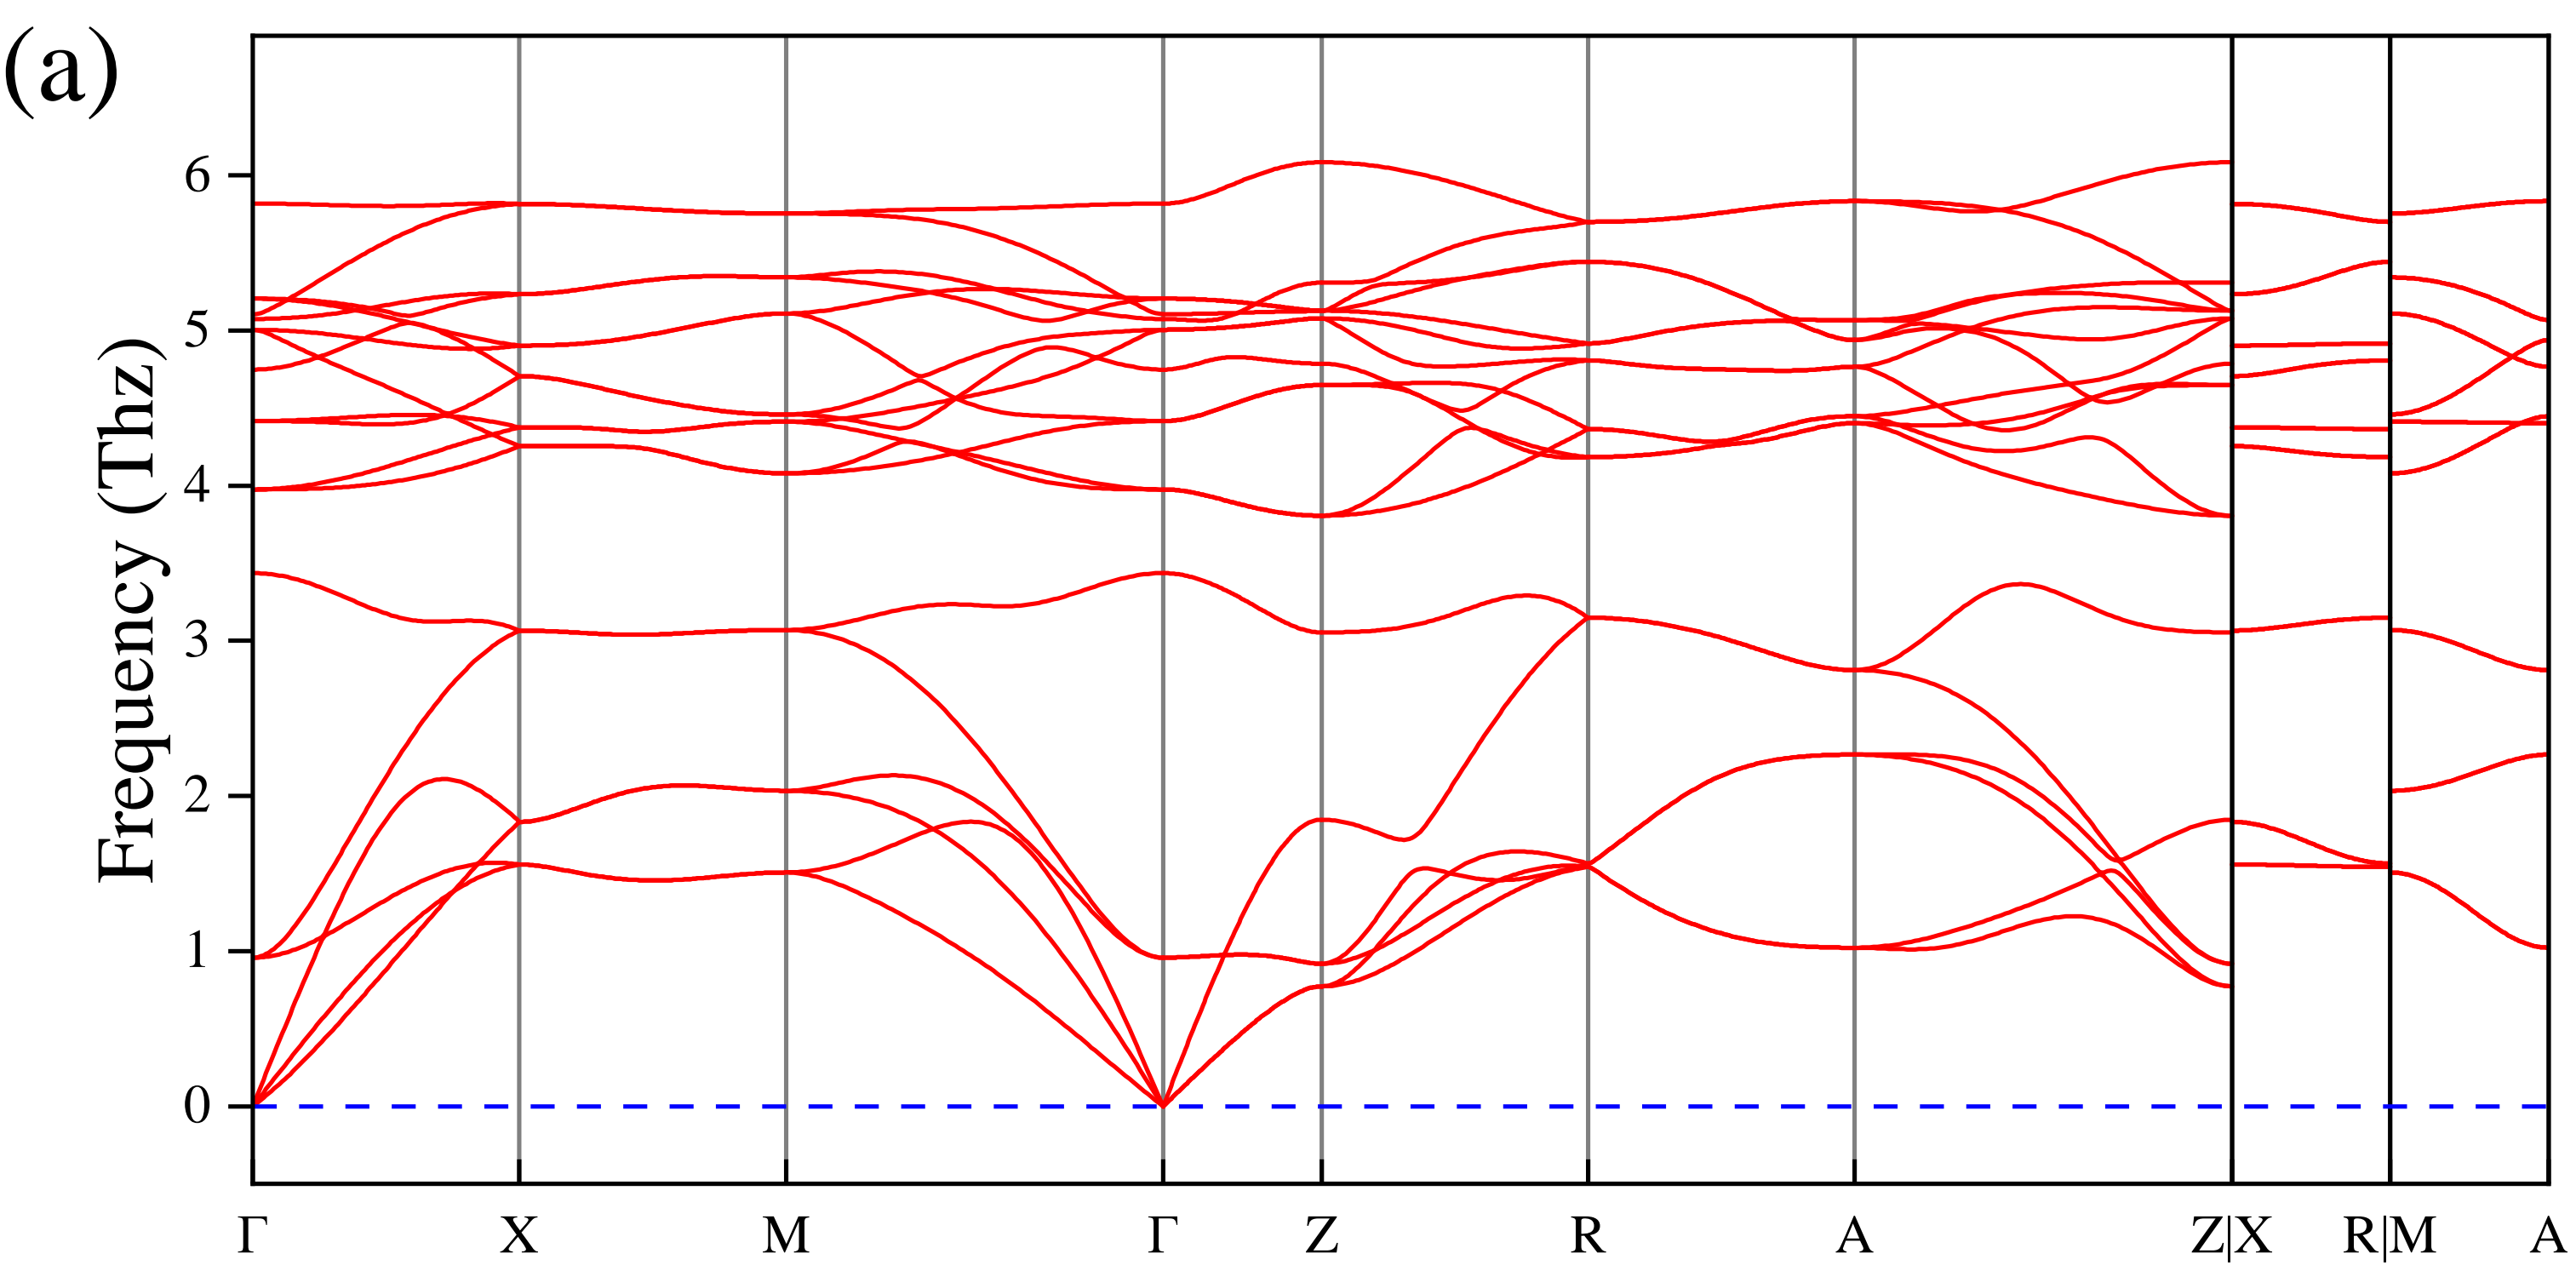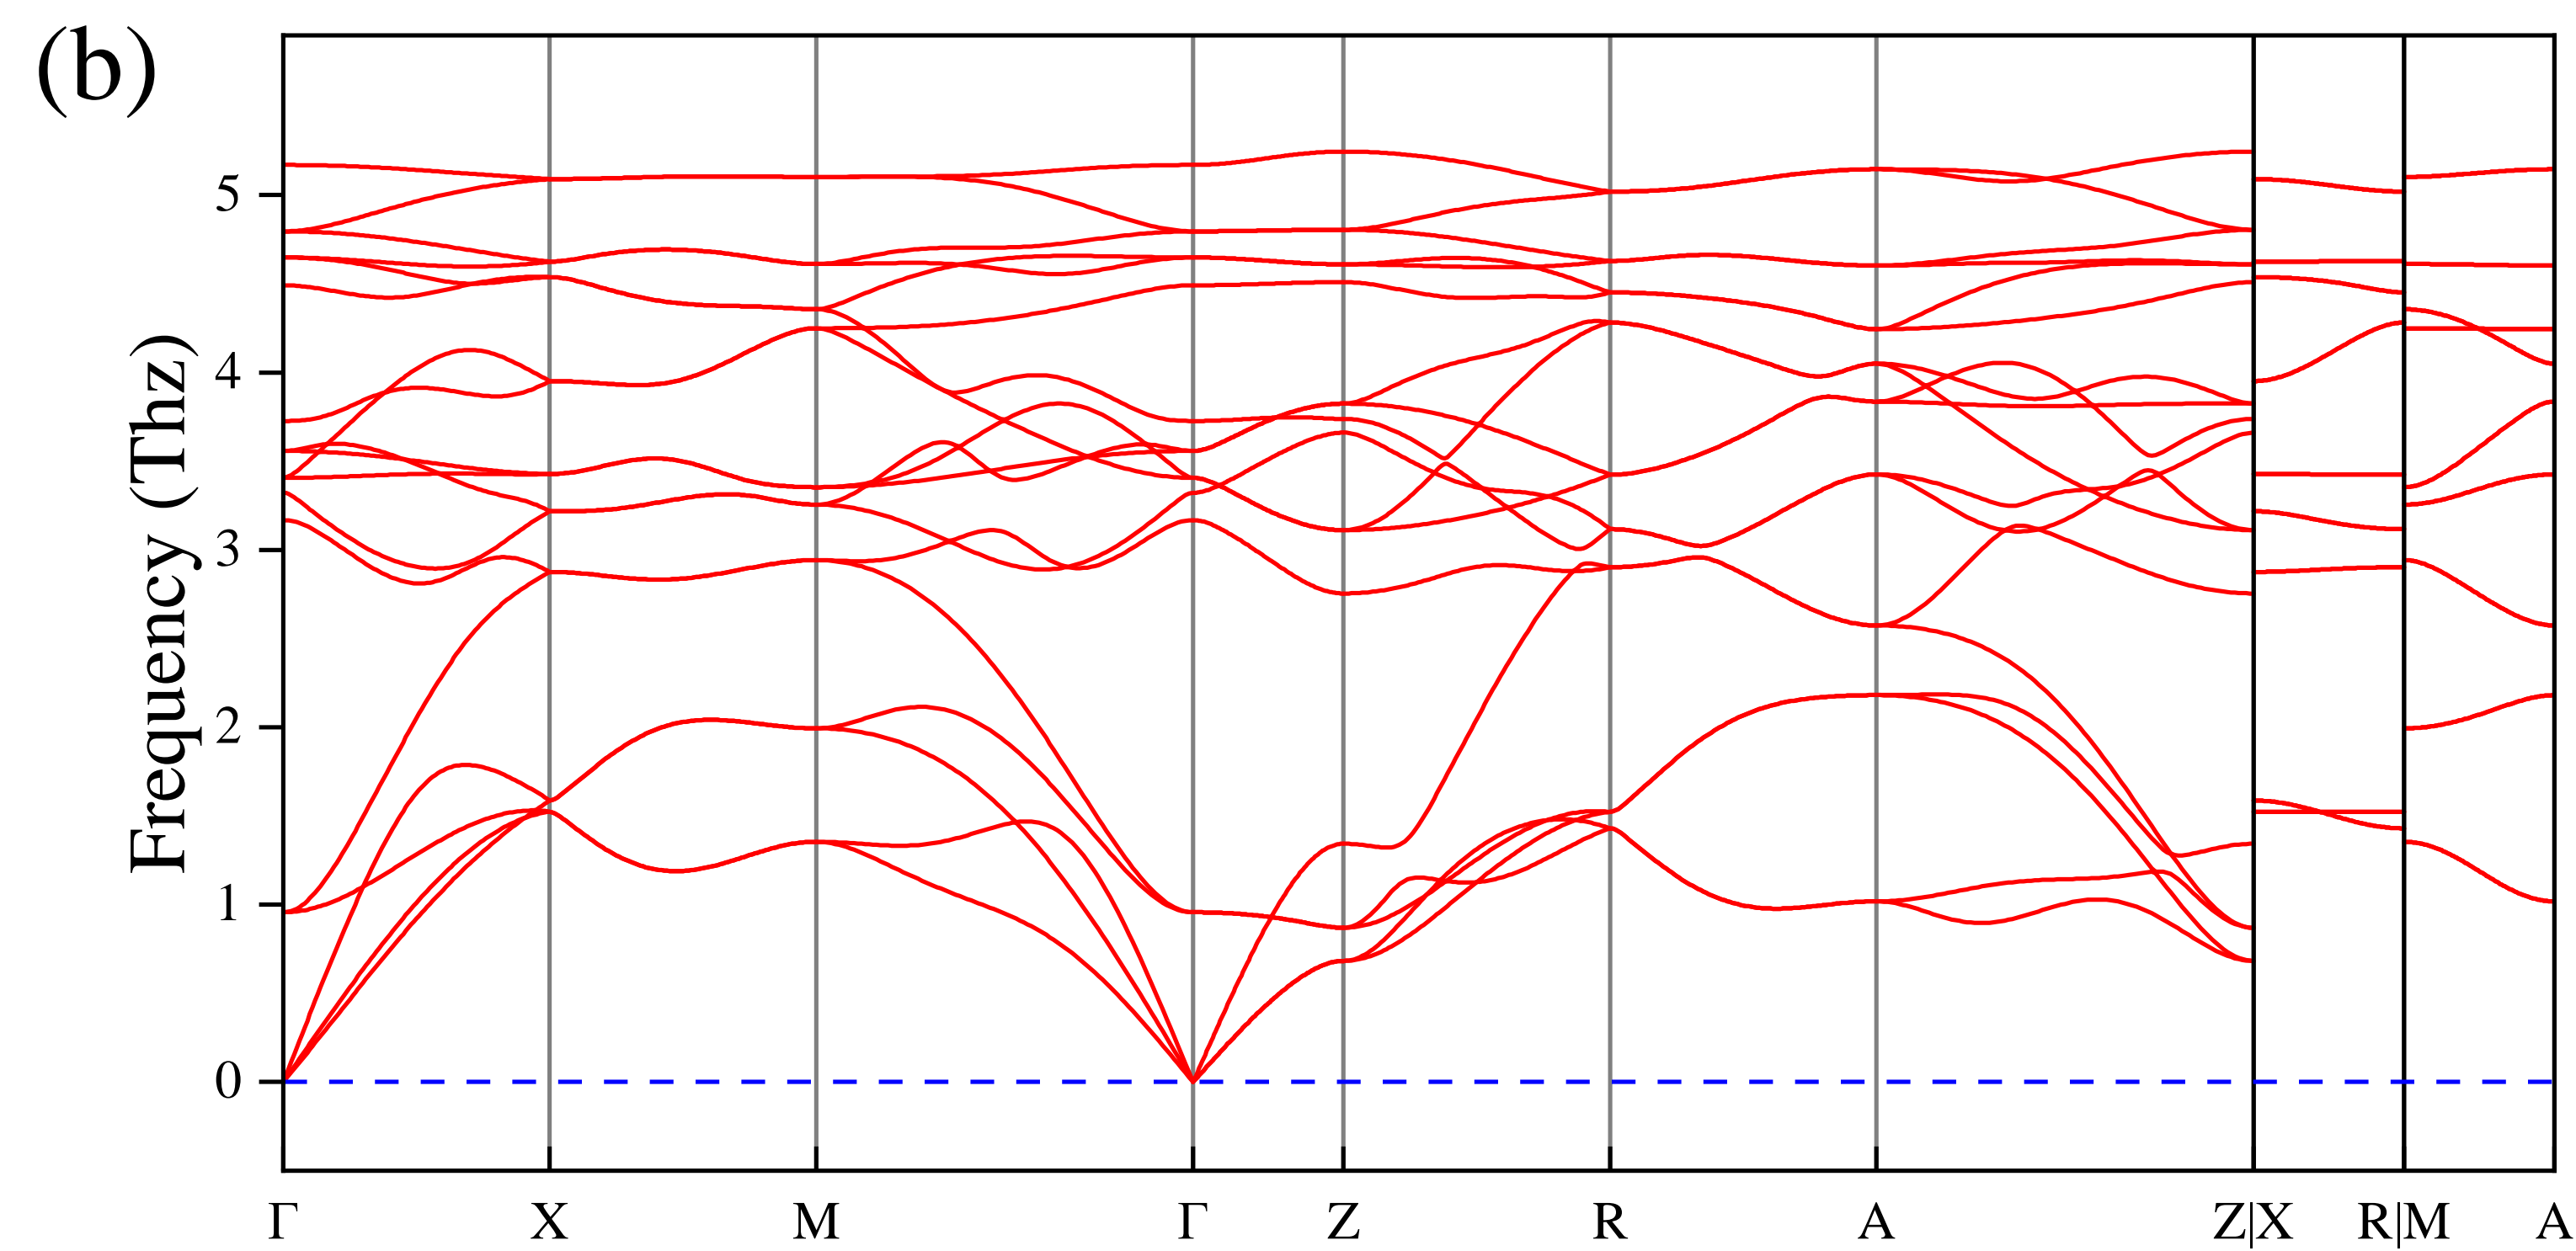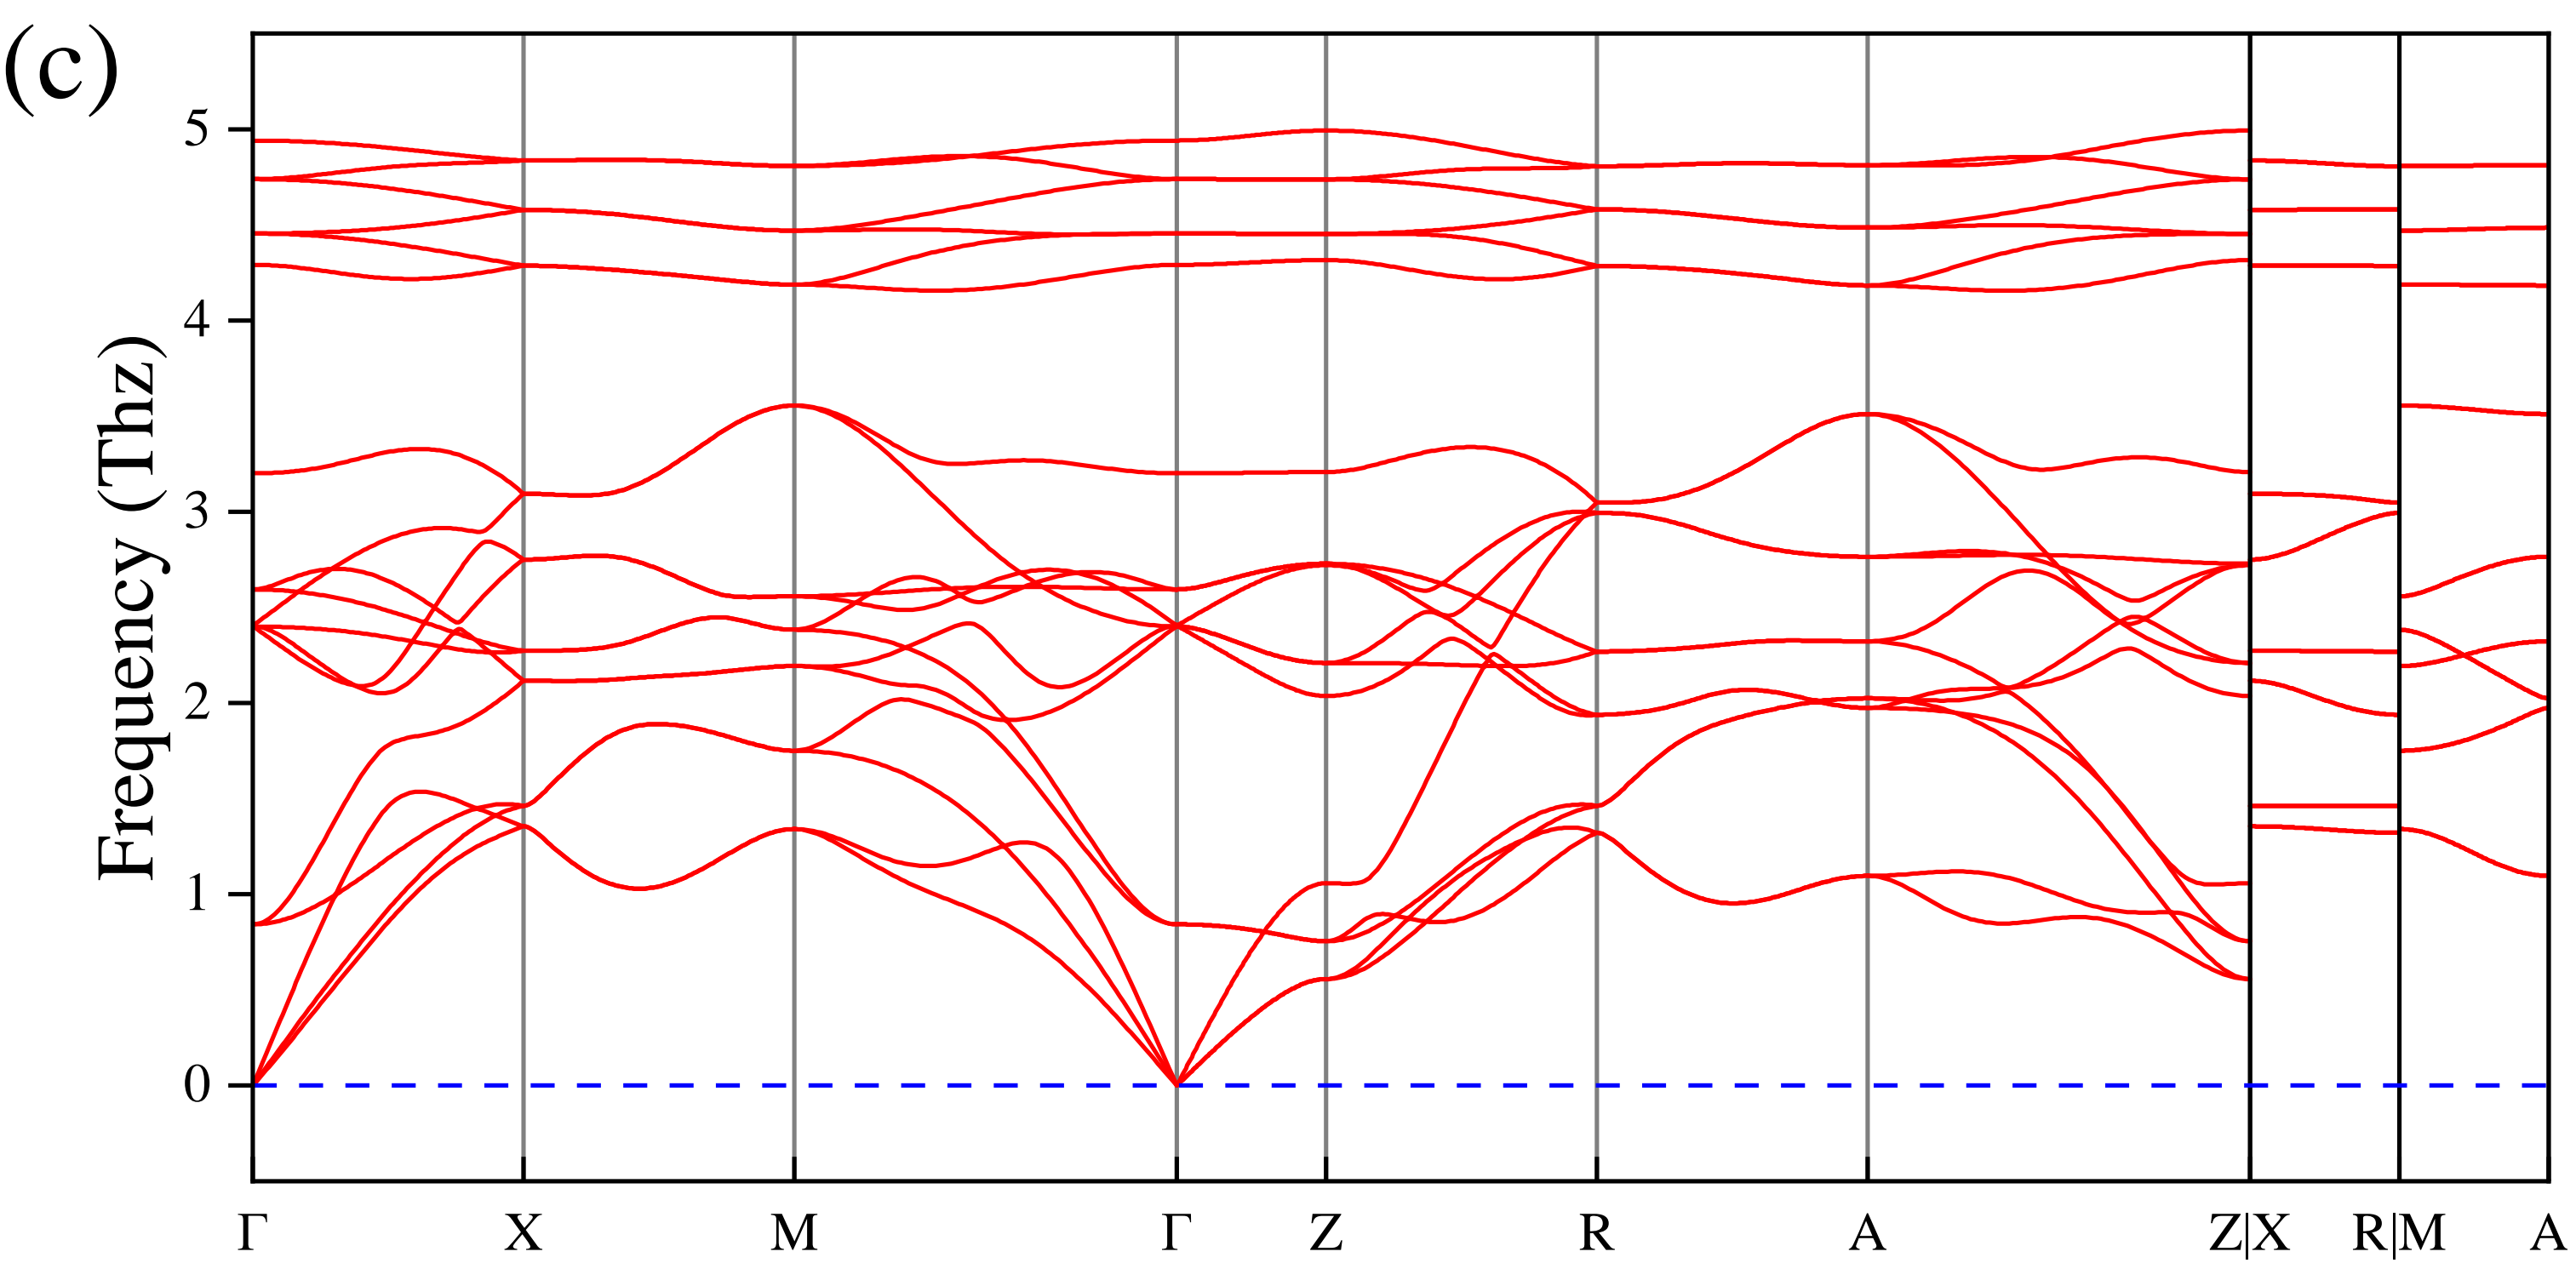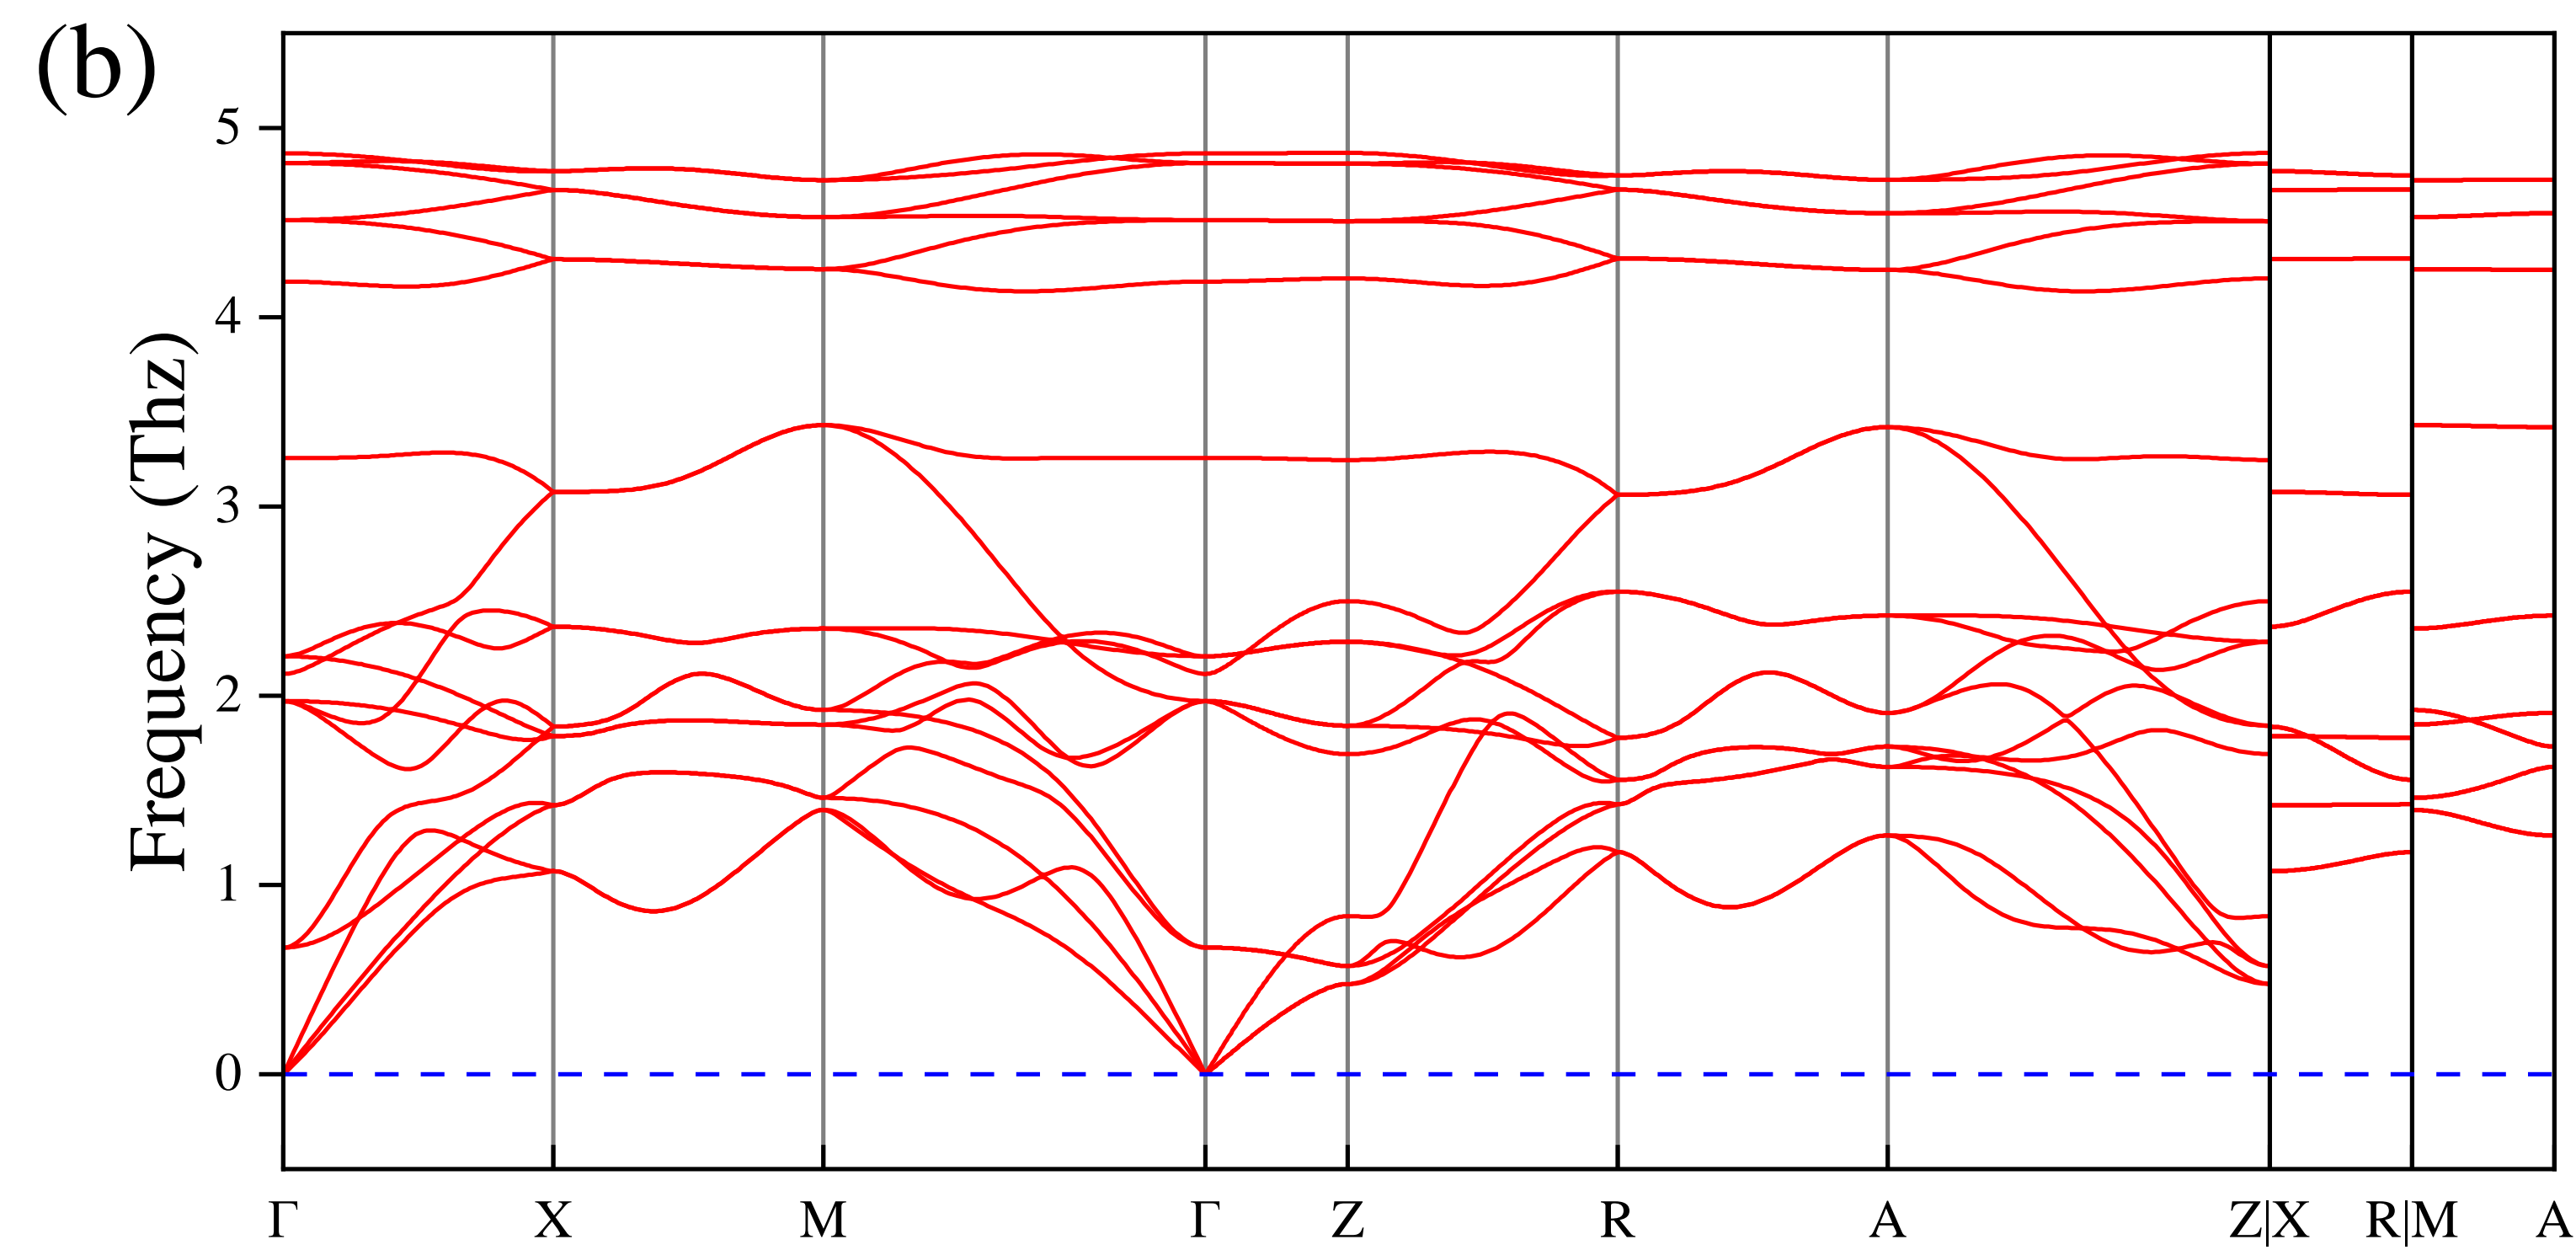

Supplement: d4cp02235a2.zip [file d4cp02235a2.zip]
